# Supplementary material
Source: PubMed Central journal article supplement (PMC10916830)
Supplement: sj-pdf-1-eso-10.1177_23969873231201715.pdf [file sj-pdf-1-eso-10.1177_23969873231201715.pdf]

**Search strategy for each database:**

| Database              | Search strategy                                                                                                                                                                                                                                                                                                                                                                                                                               | Results |
|-----------------------|-----------------------------------------------------------------------------------------------------------------------------------------------------------------------------------------------------------------------------------------------------------------------------------------------------------------------------------------------------------------------------------------------------------------------------------------------|---------|
| <b>Ovid Medline</b>   | 1 exp Ischemic Stroke/ or exp Stroke/ 171158<br>2 stroke\$.mp. 375518<br>3 exp Cerebral Infarction/ or exp Infarction/ 244572<br>4 exp Infarction, Posterior Cerebral Artery/ 304<br>5 PCA\$.mp. 65658<br>6 posterior cerebral artery\$.mp. 3849<br>7 exp Thrombectomy/ 11166<br>8 thrombectomy\$.mp. 18760<br>9 Endovascular\$.mp. 72627<br>10 7 or 8 or 9 85649<br>11 4 or 5 or 6 68379<br>12 1 or 2 or 3 580901<br>13 10 and 11 and 12 195 | 195     |
| <b>Embase</b>         | ('stroke'/exp OR 'ischemic stroke'/exp OR 'large vessel occlusion'/exp OR 'medium vessel occlusion') AND<br>('endovascular thrombectomy'/exp OR 'thrombectomy'/exp OR 'mechanical thrombectomy'/exp OR 'endovascular procedure'/exp)<br>AND ('posterior cerebral artery'/exp OR 'pca'/exp OR 'p1' OR 'p2' OR 'p3')                                                                                                                            | 333     |
| <b>Web of Science</b> | (ALL=(stroke) OR ALL=(ischemic stroke) OR ALL=(Large vessel occlusion) OR ALL=(LVO) OR ALL=(medium distal vessel occlusion) OR ALL=(medium vessel occlusion) OR ALL=(MeVO) OR ALL=(MDVO)) AND<br>(ALL=(endovascular thrombectomy) OR ALL=(endovascular procedures) OR ALL=(mechanical thrombectomy) OR ALL=(thrombectomy) OR ALL=(embolectomy))<br>AND (ALL=(Posterior Cerebral Artery) OR ALL=(PCA) OR ALL=(P1) OR ALL=(P2) OR ALL=(P3))     | 405     |
| <b>Ovid CENTRAL</b>   | 1 exp Ischemic Stroke/ or exp Stroke/ 14437<br>2 stroke\$.mp. 67128<br>3 exp Cerebral Infarction/ or exp Infarction/ 15949<br>4 exp Infarction, Posterior Cerebral Artery/ 5<br>5 PCA\$.mp. 6288<br>6 posterior cerebral artery\$.mp. 151<br>7 exp Thrombectomy/ 654<br>8 thrombectomy\$.mp. 2089<br>9 Endovascular\$.mp. 4694<br>10 7 or 8 or 9 5909<br>11 4 or 5 or 6 6385<br>12 1 or 2 or 3 78767<br>13 10 and 11 and 12 24                | 24      |

**Table S1:** Baseline characteristics of patients treated with endovascular thrombectomy or best medical management for each study included in the meta-analysis.

| Study ID                    | No. patients<br>(% female) |               | Age<br>Median (IQR) |                        | Baseline NIHSS<br>Median (IQR) |                | Baseline mRS<br>Median (IQR) or N (%)                                          |                                                                                    | IVT<br>N (%) |            |
|-----------------------------|----------------------------|---------------|---------------------|------------------------|--------------------------------|----------------|--------------------------------------------------------------------------------|------------------------------------------------------------------------------------|--------------|------------|
|                             | EVT                        | BMM           | EVT                 | BMM                    | EVT                            | BMM            | EVT                                                                            | BMM                                                                                | EVT          | BMM        |
| <b>Cunha et al, 2021</b>    | 25<br>(36.0)               | 13<br>(46.2)  | 80.2<br>(73.8-83.4) | 74.9<br>(68.9-82.5)    | 10<br>(6-14.5)                 | 10<br>(6-14.5) | 0 : n= 22 (88.0%)<br>2 : n= 0 (0%)<br>3 : n= 3 (12.0%)<br>4 : n= 0 (0%)        | 0 : n= 10 (76.9%)<br>2 : n= 1 (7.7%)<br>3 : n= 0 (0%)<br>4 : n= 2 (15.4%)          | 14 (56)      | 13 (100)   |
| <b>Herweh et al, 2021</b>   | 23<br>(39.1)               | 107<br>(47.7) | 77.5<br>(66-82)     | Mean (SD) 74<br>(13.1) | 9<br>(1-20)                    | 7<br>(1-38)    | Median (IQR): 0 (0-4)                                                          | 1 (0-3)                                                                            | 5 (21.7)     | 44 (41.1)  |
| <b>Maulucci et al, 2023</b> | 119<br>(35.3)              | 149<br>(45.6) | 72.2<br>(62.1-80.0) | 75.7<br>(66.5-83.6)    | 7<br>(5-13)                    | 7<br>(5-13)    | 0 : n= 90 (75.6%)<br>1 : n= 15 (12.6%)<br>2 : n= 14 (11.8%)                    | 0 : n= 109 (73.2%)<br>1 : n= 31 (20.8%)<br>2 : n= 9 (6.0%)                         | 69 (57.98)   | 149 (100)  |
| <b>Meyer et al, 2021</b>    | 143<br>(44.8)              | 100<br>(50.0) | 75<br>(62-81)       | 75<br>(62-81)          | 7<br>(4-11)                    | 7<br>(4-11)    | Median (IQR): 0 (0-1)                                                          | 0 (0-2)                                                                            | 57 (39.9)    | 56(56.0)   |
| <b>Nguyen et al, 2023</b>   | 378<br>(42.9)              | 645<br>(42.2) | 74<br>(64-82)       | 75<br>(64-82)          | 8<br>(5-12)                    | 8<br>(5-12)    | 0 : n= 283 (63%)<br>1 : n= 74 (22.0%)<br>2 : n= 39 (10.3%)<br>3 : n= 27 (7.1%) | 0 : n= 341 (52.9%)<br>1 : n= 142 (22.0%)<br>2 : n= 90 (14.0%)<br>3 : n= 72 (11.2%) | 152 (40.2)   | 287 (45.5) |
| <b>Sabben et al, 2023</b>   | 167<br>(47.3)              | 585<br>(42.7) | 72<br>(62-82)       | 74<br>(63-83)          | 8<br>(5-11)                    | 8<br>(5-11)    | Median (IQR): 0 (0-1)                                                          | 0 (0-1)                                                                            | 90 (53.9)    | 467 (79.8) |
| <b>Strambo et al, 2020</b>  | 21<br>(61.9)               | 85<br>(43.5)  | 71<br>(64-78.2)     | 76.6<br>(68.3-83.8)    | 7<br>(5-8.3)                   | 7<br>(5-8.3)   | mRS >2= n= 1<br>(4.8%)                                                         | mRS >2= n= 10<br>(11.8%)                                                           | 13 (61.9)    | 34(40)     |

Abbreviations: EVT, endovascular thrombectomy; BMM, best medical management; NIHSS, National Institutes of Health Stroke Scale; mRS, modified Rankin scale; IVT, intravenous thrombolysis; SD, standard deviation; IQR, interquartile range.





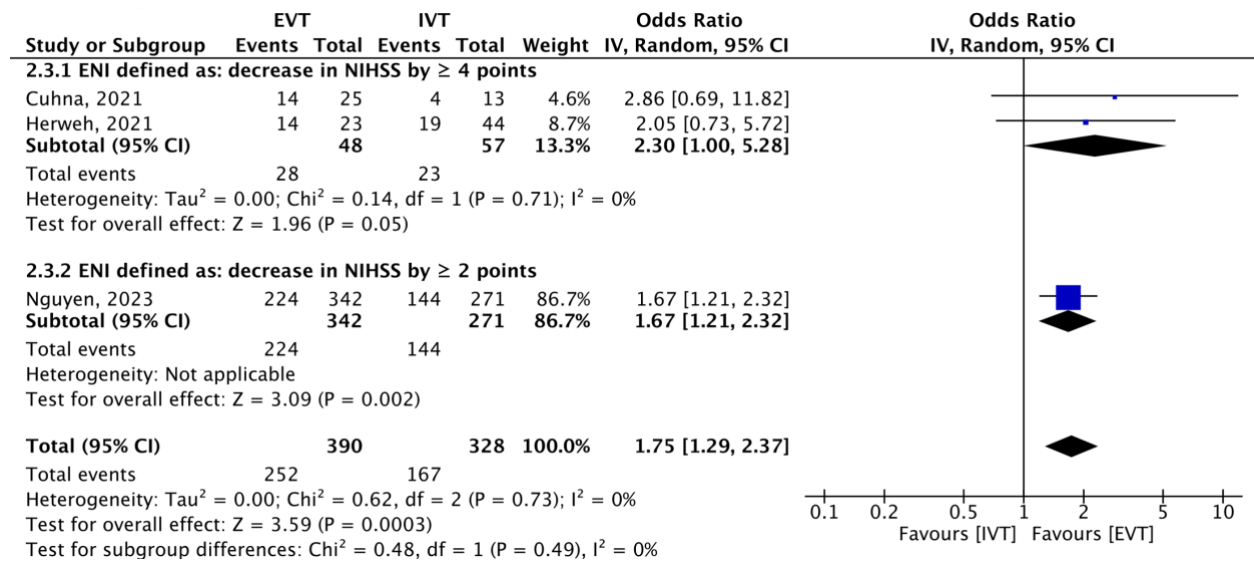

**Figure S1:** Rates of Early Neurological Improvements for patient groups treated with either endovascular thrombectomy or intravenous thrombolysis. IVT, Intravenous Thrombolysis; EVT, Endovascular Thrombectomy; ENI, Early Neurological Improvement; NIHSS, National Institutes of Health Stroke Scale; CI, confidence interval; IV, Inverse Variance.

**A.**

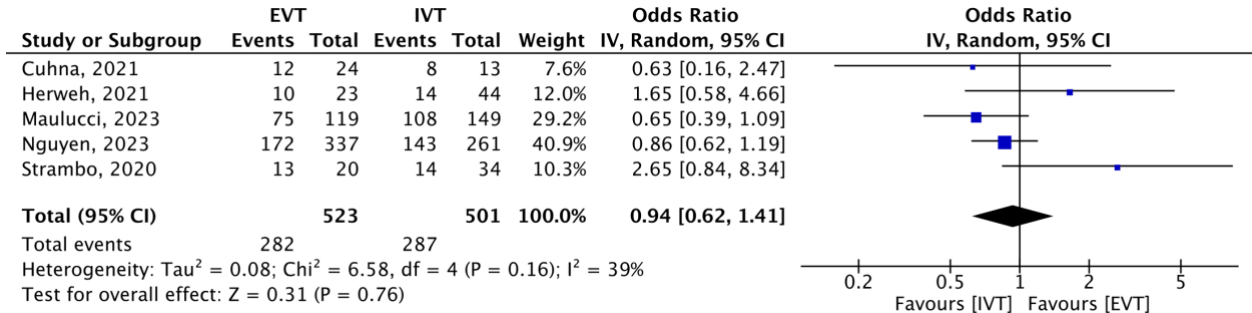

**B.**

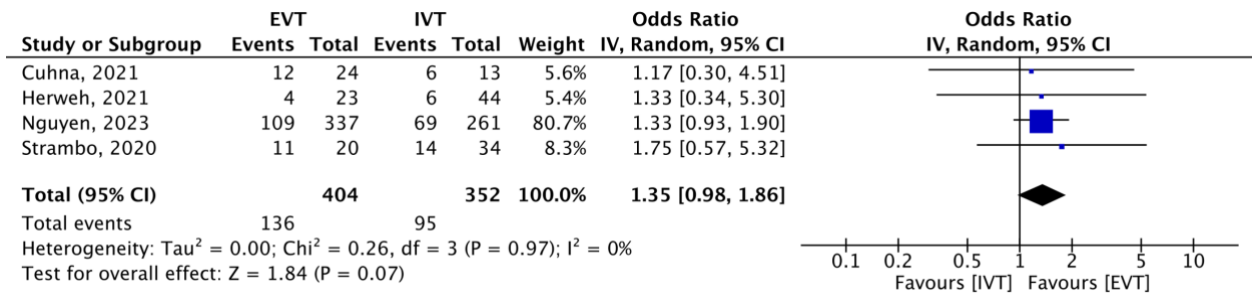

**Figure S2: A:** rates of favorable functional outcome (mRS score of 0-2) at 3 months for patient groups treated with either endovascular thrombectomy or intravenous thrombolysis. **B:** Rates of excellent functional outcome (mRS score of 0-1) at 3 months for patient groups treated with either endovascular thrombectomy or intravenous thrombolysis. IVT, Intravenous Thrombolysis; EVT, Endovascular Thrombectomy; mRS, Modified Rankin Scale; CI, Confidence Interval; IV, Inverse Variance.

**A.**

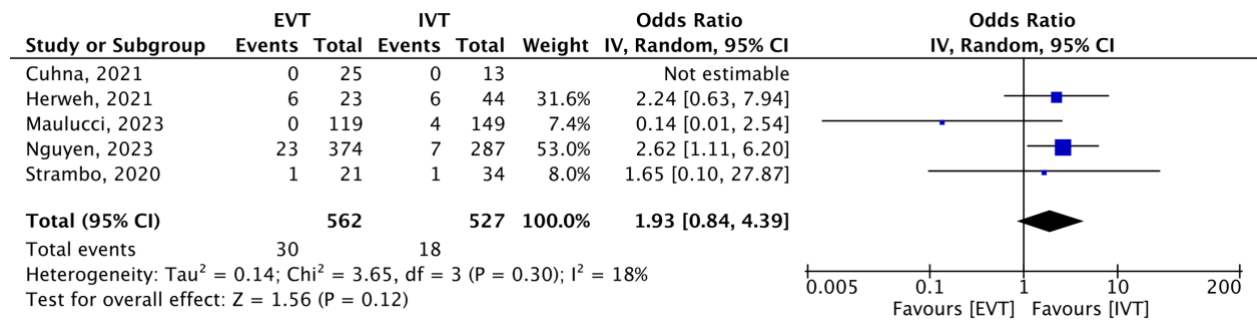

**B.**

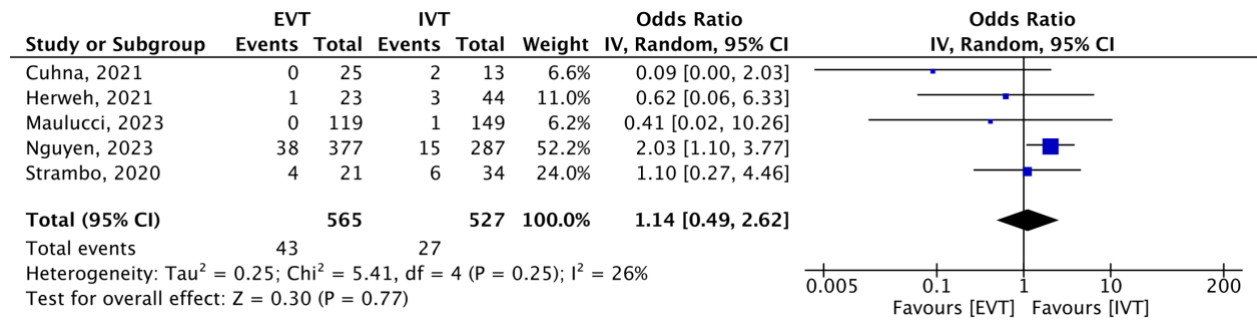

**Figure S3: A:** sICH rates for patient groups treated with either endovascular thrombectomy or intravenous thrombolysis. **B:** Mortality rates at 3 months for patient groups treated with either endovascular thrombectomy or intravenous thrombolysis. IVT, Intravenous Thrombolysis; EVT, Endovascular Thrombectomy; CI, Confidence Interval; IV, Inverse Variance.
